# Supplementary material for: Non-isothermal crosslinking of ethylene vinyl acetate initiated by crosslinking agents: kinetic modelling
Source: Royal Society of Chemistry journal article supplement (doi:10.1039/d2ra01994a), 2022-01-01
Supplement: d2ra01994a1.pdf [file d2ra01994a1.pdf]

Supplementary Material

**Non-isothermal crosslinking of ethylene vinyl acetate initiated by  
crosslinking agents: A kinetic modelling**

**Fanwei Zeng, Xing Guo, Li Sun\*, Xuelian He, Zuoxiang Zeng, Zhen Liu\***

*School of Chemical Engineering, East China University of Science and Technology,*

*Shanghai 200237, China*

*Email: [sunli@ecust.edu.cn](mailto:sunli@ecust.edu.cn); [liuzhen@ecust.edu.cn](mailto:liuzhen@ecust.edu.cn)*

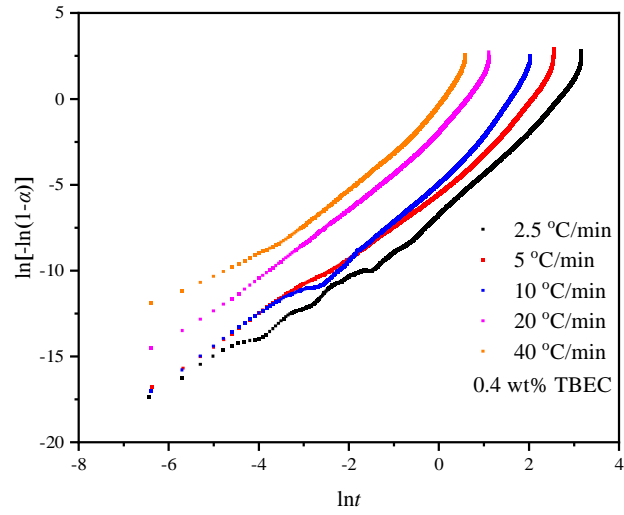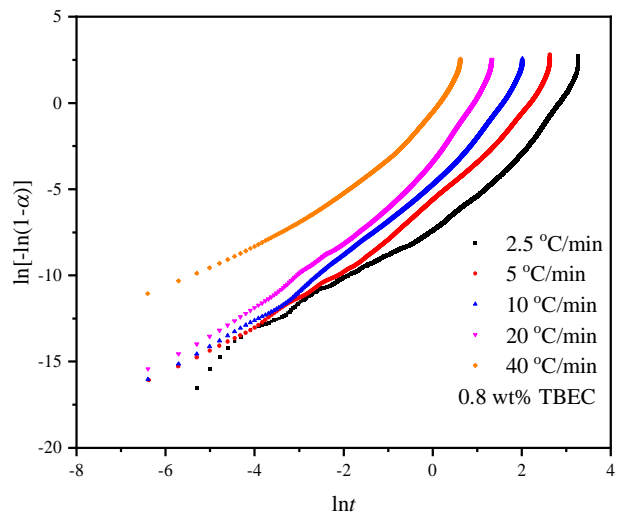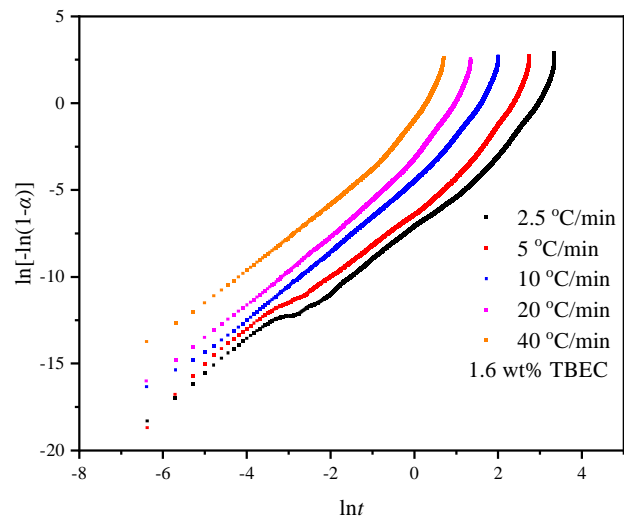

Fig. S1. Avrami plots for EVA samples with different TBEC contents at different heating rates.

Table S1. Avrami kinetic parameters calculated from the double log plot.

| TBEC content | $\phi$ ( $^{\circ}\text{C}/\text{min}$ ) | $n$  | $Z_c$ | $t_{1/2}$ (min) | $r$    |
|--------------|------------------------------------------|------|-------|-----------------|--------|
| 0.4 wt%      | 2.5                                      | 2.56 | 0.03  | 3.24            | 0.9911 |
|              | 5                                        | 2.59 | 0.34  | 1.31            | 0.9846 |
|              | 10                                       | 2.83 | 0.64  | 1.03            | 0.9835 |
|              | 20                                       | 2.56 | 0.93  | 0.89            | 0.9887 |
|              | 40                                       | 2.53 | 1.00  | 0.87            | 0.9828 |
| 0.8 wt%      | 2.5                                      | 2.65 | 0.05  | 2.74            | 0.9769 |
|              | 5                                        | 2.60 | 0.32  | 1.34            | 0.9860 |
|              | 10                                       | 2.75 | 0.65  | 1.02            | 0.9839 |
|              | 20                                       | 2.92 | 0.87  | 0.93            | 0.9798 |
|              | 40                                       | 2.41 | 0.99  | 0.86            | 0.9752 |
| 1.6 wt%      | 2.5                                      | 2.59 | 0.02  | 3.79            | 0.9789 |
|              | 5                                        | 2.70 | 0.28  | 1.40            | 0.9765 |
|              | 10                                       | 2.66 | 0.66  | 1.02            | 0.9828 |
|              | 20                                       | 2.75 | 0.88  | 0.92            | 0.9830 |
|              | 40                                       | 2.62 | 0.98  | 0.87            | 0.9801 |

Table S2. Activation energies for each extent of conversion ( $\alpha$ ) of the crosslinking reaction calculated by FWO method.

| TBEC content | $\alpha$ | $E_a$  | $r$    |
|--------------|----------|--------|--------|
| 0.4 wt%      | 0.1      | 117.31 | 0.9974 |
|              | 0.2      | 117.75 | 0.9995 |
|              | 0.3      | 117.57 | 0.9999 |
|              | 0.4      | 117.71 | 0.9999 |
|              | 0.5      | 118.21 | 0.9999 |
|              | 0.6      | 119.34 | 0.9998 |
|              | 0.7      | 120.86 | 0.9997 |
|              | 0.8      | 122.65 | 0.9993 |
|              | 0.9      | 124.89 | 0.9988 |
| 0.8 wt%      | 0.1      | 121.32 | 0.9951 |
|              | 0.2      | 121.53 | 0.9970 |
|              | 0.3      | 120.14 | 0.9978 |
|              | 0.4      | 119.12 | 0.9980 |
|              | 0.5      | 118.90 | 0.9980 |
|              | 0.6      | 119.82 | 0.9979 |
|              | 0.7      | 121.42 | 0.9979 |
|              | 0.8      | 123.30 | 0.9982 |
|              | 0.9      | 124.98 | 0.9986 |
| 1.6 wt%      | 0.1      | 123.91 | 0.9989 |
|              | 0.2      | 123.71 | 0.9993 |
|              | 0.3      | 123.74 | 0.9995 |
|              | 0.4      | 125.77 | 0.9996 |
|              | 0.5      | 128.18 | 0.9997 |
|              | 0.6      | 129.91 | 0.9997 |
|              | 0.7      | 131.20 | 0.9997 |
|              | 0.8      | 132.39 | 0.9995 |
|              | 0.9      | 133.49 | 0.9992 |
